# Supplementary material for: Pb2+ induced DNA conformational switch from hairpin to G-quadruplex: electrochemical detection of Pb2+
Source: Royal Society of Chemistry journal article supplement (doi:10.1039/c1an15080d), 2011-01-01
Supplement: c1an15080d.pdf [file c1an15080d.pdf]

## Supporting Information

### **Pb<sup>2+</sup> Induced DNA Conformational Switch from Hairpin to G-quadruplex:**

#### **Electrochemical Detection of Pb<sup>2+</sup>**

**Zhenzhen Lin,<sup>†</sup> Yue Chen,<sup>†</sup> Xiaohong Li,<sup>†\*</sup> Weihai Fang<sup>†\*</sup>**

*Department of Chemistry, Beijing Normal University, Beijing, 100875, China*

### **Experimental**

**DNA sequences and preparation of Monolayer Preparation** (The underlined are complementary pairs).

DNA(1): 5'-HO-(CH<sub>2</sub>)<sub>6</sub>-SS-(CH<sub>2</sub>)<sub>6</sub>-TTTTT-CCAAC-GGTTGG-TGT-GGTTGG-3'

DNA(2): 5'-TTTTT-CCAAC-GGTTGG-TGT-GGTTGG-3'

DNA(3): 5'-HO-(CH<sub>2</sub>)<sub>6</sub>-SS-(CH<sub>2</sub>)<sub>6</sub>-CGT-GCG-GAT-TTT-CCA-CTT-GCT-GTG-CGC-ACG-3'

Newborn Calf serum were purchased from invitrogen corporation(New Zealand) and diluted with 20 mM Tris-ClO<sub>4</sub> buffer ten times for use.

Films of hairpin DNA (1) and DNA (3) were prepared by incubating freshly cleaned gold electrodes in solutions of 10 μM DNA strand (1), followed by soaking the film in 1 mM 6-mercaptohexanol in 20 mM Tris-ClO<sub>4</sub>. The EIS of the films were recorded.

**Theoretical Computation.** The hairpin DNA chain has 20 nuclei acid units. All the phosphate moieties were replaced by phosphate ester. Then the whole molecule has 726 atoms. Density functional CAM-B3LYP<sup>1</sup> implemented in Gaussian 09 program package<sup>2</sup> were employed to optimization the structures with mixed basis sets, where 3-21G\* was used for C, N, O and H atoms and 6-31G\* for P atoms and LANL2DZ for Pb atom.

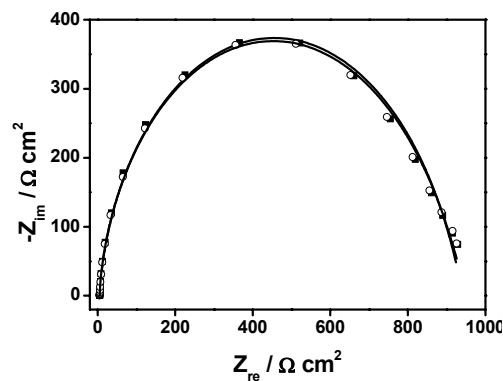

**Figure S1.** Representative Nyquist plots ( $-Z_{im}$  vs  $Z_{re}$ ) for films of hairpin DNA (3) before(■) and after incubating with 50  $\mu\text{M}$   $\text{PbClO}_4$  solution after t buffer washing(○).

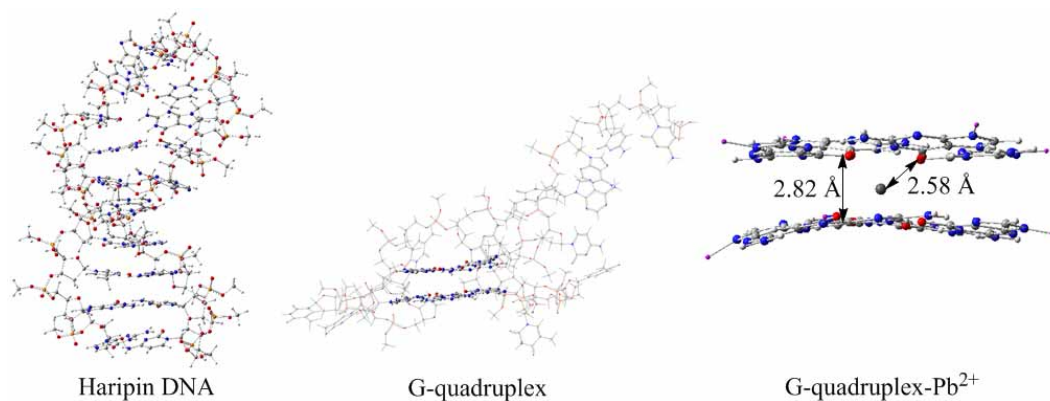

**Figure S2.** The optimized structures of hairpin DNA, G-quadruplex (without  $\text{Pb}^{2+}$ ) and G-quadruplex- $\text{Pb}^{2+}$ . For clarity, some parts of G-quadruplex- $\text{Pb}^{2+}$  were hidden.

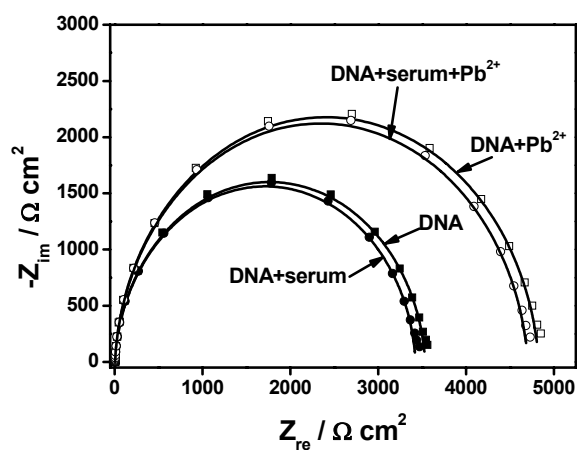

**Figure S3.** Representative Nyquist plots ( $-Z_{im}$  vs  $Z_{re}$ ) for films of hairpin DNA (1) (■) ;DNA (1) incubated in serum(●); DNA (1) incubated in 50  $\mu\text{M}$   $\text{PbClO}_4$  solution(□); DNA (1) incubated in the mixture of serum and 50  $\mu\text{M}$   $\text{PbClO}_4$  solution(○).

**Table S1. Summary of the assays for Pb<sup>2+</sup> detection reported by other authors <sup>a</sup>**

| Methods                                                                                 | DNA Sequence               | Transducer                        | Detection Range                          | Detection Limit |
|-----------------------------------------------------------------------------------------|----------------------------|-----------------------------------|------------------------------------------|-----------------|
| DNAzyme sensor based on electrode-bound DNAzyme assembly <sup>3</sup>                   | 8-17 DNAzyme               | electrochemical                   | 0.5μM - 10μM                             | 0.3μM           |
| DNA-Au Bio-Bar codes <sup>4</sup>                                                       | 8-17 DNAzyme               | electrochemical                   | 5nM - 0.1μM                              | 1 nM            |
| DNAzyme sensor based on functionalized gold nanoparticles <sup>5</sup>                  | 8-17 DNAzyme               | electrochemical                   | 0.1nM - 35nM                             | 28pM            |
| DNAzyme sensor based on catalytic and molecular beacon <sup>6</sup>                     | 8-17 DNAzyme               | fluorescent                       | 3nM - 5μM                                | 0.6 nM          |
| DNAzyme sensor based on abasic site-containing DNAzyme <sup>7</sup>                     | 8-17 DNAzyme               | fluorescent                       | 0 - 1μM                                  | 4 nM            |
| DNAzyme sensor based on GR-5 DNAzyme <sup>8</sup>                                       | GR-5 DNAzyme               | fluorescent                       | 25nM - 2μM                               | 3.7nM           |
| Sensor based on thrombin-binding aptamer with 5'-FAM and 3'-DABCYL <sup>9</sup>         | thrombin-binding aptamer   | fluorescent                       | 0.5nM - 30nM                             | 0.3nM           |
| Label-free colorimetric detection based on gold nanoparticles and DNAzyme <sup>10</sup> | 8-17 DNAzyme               | colorimetric                      | 3nM - 100nM                              | 3 nM            |
| DNAzyme cascades <sup>11</sup>                                                          | 8-17 DNAzyme               | colorimetric or chemiluminescence | 10 nM - 10μM                             | 10 nM           |
| Sensor based on Lead(II)-Induced Allosteric G-Quadruplex DNAzyme <sup>12</sup>          | G-quadruplex DNAzyme PS2.M | colorimetric or chemiluminescence | 0.1 μM-10 μM or 1nM-10 <sup>-6.5</sup> M | 32nM/ 1nM       |

<sup>a</sup> The bibliographic reference, methods, DNA sequence, transducer, detection range and detection limit reported by authors are reviewed.

### References:

1. T. Yanai, D. P. Tew, N. C. Handy, *Chem. Phys. Lett.*, 2004, **393**, 51-57.
2. M. J. Frisch, G. W. Trucks, H. B. Schlegel, Gaussian 09, Revision A.02; Gaussian, Inc, Wallingford CT, 2009.
3. Y. Xiao, A. A. Rowe and K. W. Plaxco, *J. Am. Chem. Soc.*, 2007, **129**, 262-263.
4. L. Shen, Z. Chen, Y. H. Li, S. L. He, S. B. Xie, X. D. Xu, Z. W. Liang, X. Meng, Q. Li, Z. W. Zhu, M. X. Li, X. C. Le and Y. H. Shao, *Anal. Chem.*, 2008, **80**, 6323-6328.
5. X. R. Yang, J. Xu, X. M. Tang, H. X. Liu and D. B. Tian, *Chem. Commun.*, 2010, **46**, 3107-3109.

6. X. B. Zhang, Z. D. Wang, H. Xing, Y. Xiang and Y. Lu, *Anal. Chem.*, 2010, **82**, 5005–5011.
7. Y. Xiang, A. Tong and Y. Lu, *J. Am. Chem. Soc.*, 2009, **131**, 15352–15357.
8. T. Lan, K. Furuya and Y. Lu, *Chem. Commun.*, 2010, **46**, 3896–3898.
9. C. W. Liu, C. C. Huang and H. T. Chang, *Anal. Chem.*, 2009, **81**, 2383–2387.
10. Z. D. Wang, J. H. Lee and Y. Lu, *Adv. Mater.*, 2008, **20**, 3263–3267.
11. J. Elbaz, B. Shlyahovsky and I. Willner, *Chem. Commun.*, 2008, **44**, 1569–1571.
12. T. Li, E. K. Wang and S. J. Dong, *Anal. Chem.*, 2010, **82**, 1515–1520.
